# Supplementary material for: Ribo-Pop: simple, cost-effective, and widely applicable ribosomal RNA depletion
Source: RNA. 2020 Nov;26(11):1731–42. doi: 10.1261/rna.076562.120 (PMC7566562; doi:10.1261/rna.076562.120)
Supplement: Supplemental Material [file supp_076562.120_Supplemental_Table_S3_oligos_and_software.xlsx]

## Sheet: Sheet1
QPCR OLIGOS
oligo name	sequence
OMT24_18S_RTF	TAGACCGAGAGGTCCGGGTA
OMT25_18S_RTR	CAAAGGGCAGGGACGTAATCAA
OMT28_28SL_RTF	CCTGATGGAAGACCGAAACAGT
OMT29_28SL_RTR	CTGAGGGAAACTTCGGAAGGAA
OMT30_28SR_RTF	GAGTTTGACTGGGGCGGTAC
OMT31_28SR_RTR	GCTTTTGCTGTCCCTGTGTGTA
OMT34_Act5C_RTF	CCCCATTGAGCACGGTATCG
OMT35_Act5C_RTR	CACGCAGCTCATTGTAGAAGGT
OMT121_sCer18S_RTF	TGGCGAACCAGGACTTTTAC
OMT122_sCer18S_RTR	CCGACCGTCCCTATTAATCAT
OMT125_sCer25S_RTF	CTAAGGGTCGGGTAGTGAGG
OMT126_sCer25S_RTR	CAAGGCCGTCTACAACAAGG
OMT173_sCerAct1_RTF	TTCTGAGGTTGCTGCTTTGG
OMT174_sCerAct1_RTR	CTTGGTGTCTTGGTCTACCG
SOFTWARE VERSIONS
RNA-seq pipeline
Bbmap	38.73
Bedtools	2.29.2
Bioconductor-deseq2	1.26.0
Biopython	1.77
Cutadapt	2.5
Gffutils	0.10.1
Htseq	0.12.4
Kallisto	0.46.2
Multiqc	1.7
Pandas	0.25.3
Pigz	2.3.4
Python	3.7.6
R	3.6.2
Rseqc	3.0.1
Samtools	1.10
Snakemake	5.8.1
Star	2.5.3a
Probe design pipeline
Biopython	1.76
Blast	2.9.0
Gffutils	0.10.1
Htseq	0.12.4
Mafft	7.464
Matplotlib	3.2.1
Numpy	1.18.1
Pandas	1.0.3
Primer3-py	0.6.0
Python	3.7.6
Scipy	1.4.1
Snakemake	5.15.0
Tantan	13
Figure construction and downstream analyses
Biopython	1.76
Bowtie2	2.3.5.1
Gffutils	0.10.1
Jupyterlab	2.0.1
Matplotlib	3.2.0
Numpy	1.18.1
Pandas	1.0.2
Python	3.7.6
Scipy	1.4.1
Seaborn	0.10.0
Stellar	1.4.9
